# Supplementary material for: The Genome Analysis of Methylobacterium populi YC-XJ1 with Diverse Xenobiotics Biodegrading Capacity and Degradation Characteristics of Related Hydrolase
Source: MDPI journal article supplement (doi:10.3390/ijms21124436), 2020-06-22
Supplement: s1 [file s1]

## Supplementary

**Table S1.** Statistical table of gene function annotation of strain YC-XJ1.

| Database   | Number | Percentage |
|------------|--------|------------|
| COG        | 4170   | 76.61%     |
| GO         | 3458   | 64.33%     |
| KEGG       | 2310   | 42.98%     |
| Swiss-Prot | 3174   | 58.31%     |
| Nr         | 3547   | 65.17%     |
| Pfam       | 3853   | 70.79%     |
| CAZy       | 166    | 3.09%      |
| VFDB       | 435    | 8.0%       |
| CARD       | 249    | 4.57%      |
| PHI        | 659    | 12.11%     |
| Total      | 5375   | 98.75%     |

**Table S2.** The information of the protein sequences.

| Accession Number | Organism                                  | Size(aa) |
|------------------|-------------------------------------------|----------|
| ANT80587.1       | <i>Pseudomonas</i> sp. J-5                | 309      |
| ADW65729.1       | <i>Pseudomonas azotoformans</i>           | 332      |
| AJF83912.1       | <i>Acinetobacter baumannii</i>            | 308      |
| AHZ32245.1       | <i>Aquamicrobium</i> sp. FpB-1            | 265      |
| AOO35454.1       | <i>Ochrobactrum</i> sp.                   | 382      |
| ARD08700.1       | <i>Rhodococcus</i> sp. JT-3               | 393      |
| AGZ87951.1       | <i>Rhodococcus</i> sp. JPL-2              | 379      |
| AEK27381.1       | <i>Rhodococcus</i> sp. T1                 | 379      |
| P40601           | <i>Photobacterium luminescens</i>         | 645      |
| O52756           | <i>Salmonella typhimurium</i>             | 480      |
| Q59798           | <i>Streptomyces albus</i>                 | 304      |
| P19833           | <i>Moraxella</i> sp.                      | 319      |
| Q56008           | <i>Streptomyces</i> sp.                   | 310      |
| O52270           | <i>Pseudomonas</i> sp.                    | 308      |
| P24484           | <i>Moraxella</i> sp.                      | 433      |
| Q53547           | <i>Pseudomonas fluorescens</i>            | 218      |
| Q53415           | <i>Arthrospira platensis</i>              | 207      |
| P37967           | <i>Bacillus subtilis</i>                  | 489      |
| Q01470           | <i>Pseudarthrobacter oxydans</i>          | 493      |
| Q9Z545           | <i>Streptomyces coelicolor</i>            | 502      |
| O87861           | <i>Streptomyces anulatus</i>              | 389      |
| Q44050           | <i>Arthrobacter globiformis</i>           | 375      |
| Q53403           | <i>Pseudomonas fluorescens</i>            | 382      |
| Q59260           | <i>Geobacillus thermocatenulatus</i>      | 417      |
| Q52614           | <i>Proteus vulgaris</i>                   | 290      |
| Q05489           | <i>Burkholderia glumae</i>                | 358      |
| Q9Z4M7           | <i>Staphylococcus epidermidis</i>         | 643      |
| P10335           | <i>Staphylococcus aureus</i>              | 690      |
| P08658           | <i>Pseudomonas fragi</i>                  | 293      |
| O68551           | <i>Pseudomonas luteola</i>                | 360      |
| O66015           | <i>Geobacillus stearothermophilus</i>     | 417      |
| P9541            | <i>Pseudomonas aeruginosa</i>             | 311      |
| P24640           | <i>Moraxella</i> sp.                      | 315      |
| Q02104           | <i>Psychrobacter immobilis</i>            | 317      |
| Q57427           | <i>Haemophilus influenzae</i>             | 287      |
| AAC41424         | <i>Cupriavidus necator</i>                | 364      |
| AAB89533.1       | <i>Archaeoglobus fulgidus</i> DSM 4304    | 311      |
| AEW03609.1       | <i>Sulfobacillus acidophilus</i> DSM 1033 | 304      |

|            |                                     |     |
|------------|-------------------------------------|-----|
| AJO67804   | <i>Sphingobium</i> sp. SM42         | 302 |
| AUH67707.1 | <i>Gordonia</i> sp. YC-JH1          | 355 |
| P24484     | <i>Lipase 2-Moraxella</i> sp. TA144 | 433 |
| Q9US38     | <i>Schizosaccharomyces pombe</i>    | 341 |
| P9WK86     | <i>Mycobacterium tuberculosis</i>   | 319 |
| A0A169RBE1 | <i>Methylobacterium populi</i>      | 346 |
| C5B0J6     | <i>Methylobacterium extorquens</i>  | 366 |
| C7CGE7     | <i>Methylobacterium extorquens</i>  | 347 |

**Table S3.** The detection method details of the substrate.

| Detection Substrate<br>(Wavelength,<br>Retention Time) | HPLC-Method-1                                                                                                                                                                                                                                                                                                                                                                                            |
|--------------------------------------------------------|----------------------------------------------------------------------------------------------------------------------------------------------------------------------------------------------------------------------------------------------------------------------------------------------------------------------------------------------------------------------------------------------------------|
| Benzene (260 nm,<br>1.79 min)                          | The HPLC system (Agilent 1200) equipped with column ZORBAX Eclipse XDB C18 (4.6 mm×150 mm×5 µm) and DAD (diode-array detector). The software Chemstation (version 2.3, Agilent) was used for the analysis of the results. The detection parameters were as follows:<br><br>Column temperature: 30 °C<br>Elution: 60% methanol + 40% deionized water<br>Flow rate: 1 mL/min<br><br>Injection volume: 3 µL |
| Phenol (260 nm, 4.68 min)                              |                                                                                                                                                                                                                                                                                                                                                                                                          |
| Pyrocatechol (280 nm, 2.7 min)                         |                                                                                                                                                                                                                                                                                                                                                                                                          |
| Phthalic acid (210 nm, 3.25 min)                       |                                                                                                                                                                                                                                                                                                                                                                                                          |
| Benzoic acid (230 nm, 4.69 min)                        |                                                                                                                                                                                                                                                                                                                                                                                                          |
| Salicylic acid (230 nm, 3.32 min)                      |                                                                                                                                                                                                                                                                                                                                                                                                          |
| Detection substrate<br>(wavelength,<br>retention time) | HPLC-method-2                                                                                                                                                                                                                                                                                                                                                                                            |
| Quizalofop-p-ethyl<br>(236 nm, 2.42 min)               | The same word as above<br>Column temperature: 30 °C<br>Elution: 100% methanol<br>Flow rate: 0.8 mL/min<br><br>Injection volume: 5 µL                                                                                                                                                                                                                                                                     |
| Clodinafop-propargyl<br>(230 nm, 2.35 min)             |                                                                                                                                                                                                                                                                                                                                                                                                          |
| Chlorpyrifos (205 nm, 2.42 min)                        |                                                                                                                                                                                                                                                                                                                                                                                                          |
| TPP (205 nm, 2.13 min)                                 |                                                                                                                                                                                                                                                                                                                                                                                                          |
| Phoxim (275 nm, 2.1 min)                               |                                                                                                                                                                                                                                                                                                                                                                                                          |
| Detection substrate<br>(wavelength,<br>retention time) | HPLC-method-3                                                                                                                                                                                                                                                                                                                                                                                            |
| 4-Chlorobenzoic acid<br>(230 nm, 2.9 min)              | The same word as above                                                                                                                                                                                                                                                                                                                                                                                   |
|                                                        | Column temperature: 30 °C                                                                                                                                                                                                                                                                                                                                                                                |
|                                                        | Elution: 70% methanol + 30% phosphoric acid solution (0.05%)                                                                                                                                                                                                                                                                                                                                             |
|                                                        | Flow rate: 1.0 mL/min                                                                                                                                                                                                                                                                                                                                                                                    |
|                                                        | Injection volume: 3 µL                                                                                                                                                                                                                                                                                                                                                                                   |
| Detection substrate<br>(wavelength,<br>retention time) | HPLC-method-4                                                                                                                                                                                                                                                                                                                                                                                            |
| QPE (236 nm, 2.9 min)                                  | The same word as above<br>Column temperature: 30 °C<br>Elution: 95% methanol + 5% deionized water<br>Flow rate: 0.8 mL/min<br>Injection volume: 5 µL                                                                                                                                                                                                                                                     |
| QP (236 nm, 1.4 min)                                   |                                                                                                                                                                                                                                                                                                                                                                                                          |
| CYP (236 nm, 2.4 min)                                  |                                                                                                                                                                                                                                                                                                                                                                                                          |
|                                                        |                                                                                                                                                                                                                                                                                                                                                                                                          |
| Detection substrate<br>(retention time)                | GC-method-5                                                                                                                                                                                                                                                                                                                                                                                              |

|                   |                                                                                                                                                                                                                                                                                                                                                                                                                                                                                                          |
|-------------------|----------------------------------------------------------------------------------------------------------------------------------------------------------------------------------------------------------------------------------------------------------------------------------------------------------------------------------------------------------------------------------------------------------------------------------------------------------------------------------------------------------|
| TCEP (2.203 min)  | GC system (GC-2010 SHIMADZU, Japan) equipped with a RTX-1301 capillary column (30.0 m× 0.25 mm× 0.25 μm) and FID (flame ionization detector). The detection parameters were as follows: inlet temperature was 300 °C; column temperature was 280 °C; detector temperature was 300 °C; nitrogen (purity > 99,999%) was used as the carrier gas (30 mL per minute); and the injection volume was 1.0 μL. The GC solution software (version 2.32.00, SHIMADZU) was used for the analysis of the GC results. |
| TDCPP (3.678 min) |                                                                                                                                                                                                                                                                                                                                                                                                                                                                                                          |
| DPP (3.663 min)   |                                                                                                                                                                                                                                                                                                                                                                                                                                                                                                          |
| DBP (2.528 min)   |                                                                                                                                                                                                                                                                                                                                                                                                                                                                                                          |
| DEP (2.528 min)   |                                                                                                                                                                                                                                                                                                                                                                                                                                                                                                          |

**Table S4.** The amplification primer of *qpeh2* and *deph1*.

| Name of Primer  | Sequence                     |
|-----------------|------------------------------|
| <i>qpeh2</i> -F | GCGCGAATTCATGTTGCGGATGTTAAGC |
| <i>qpeh2</i> -R | GCGCAAGCTTCTTCACGGTCGGGAAG   |
| <i>deph1</i> -F | GCGCGAATTCATGACGCCCGCCGAG    |
| <i>deph1</i> -R | GCGCAAGCTTTCAGCAGGCGGCGGCCA  |

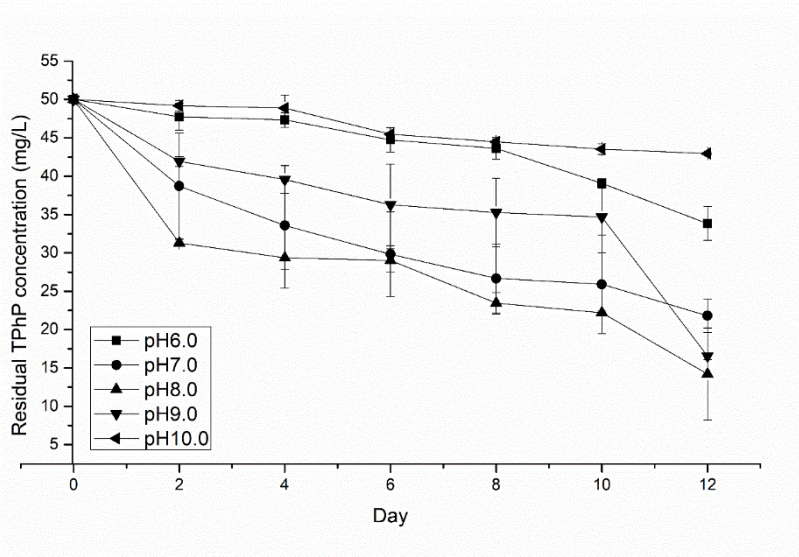

**Figure S1.** The optimal pH of TPhP-degrading by strain YC-XJ1.

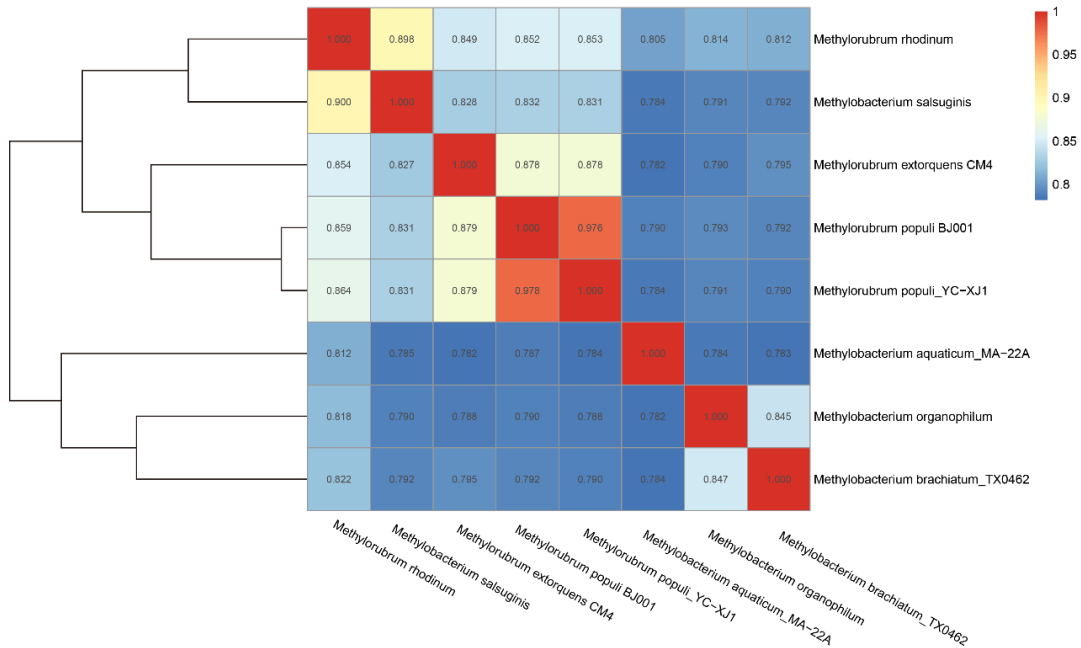

**Figure S2.** Phylogenetic trees based on average nucleotide identity (ANI).

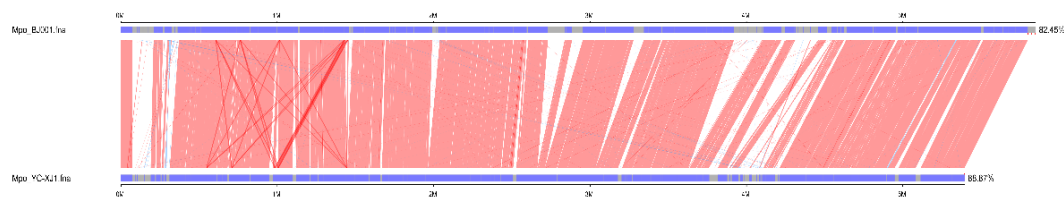

**Figure S3.** Collinearity analysis of YC-XJ1 genome and BJ001 genome.

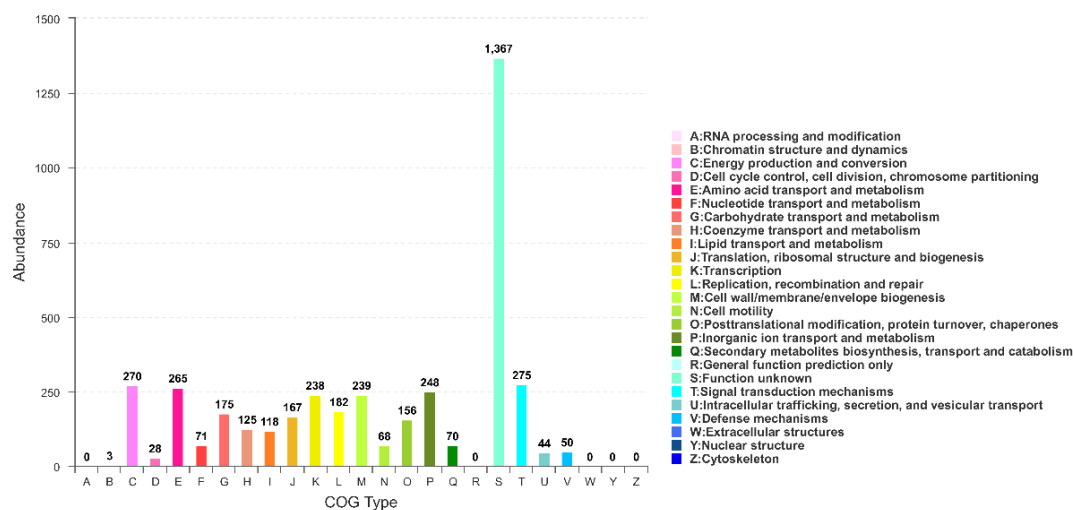

**Figure S4.** Annotation statistics of COG categories of YC-XJ1 genome.

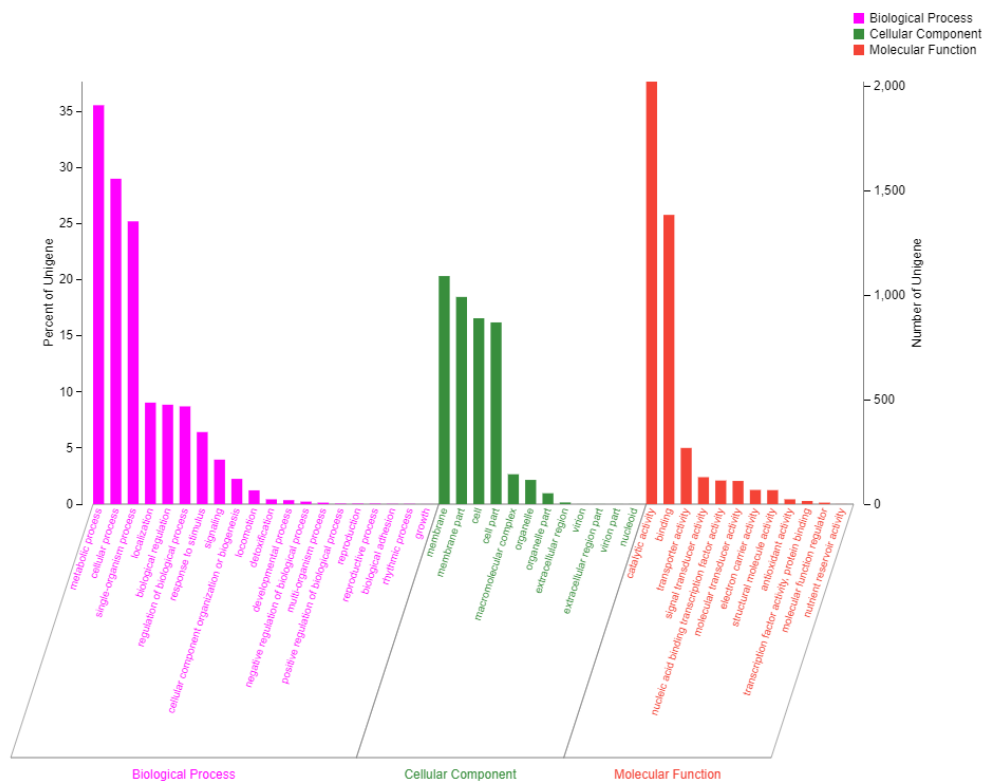

**Figure S5.** Annotation statistics of GO categories of YC-XJ1 genome.

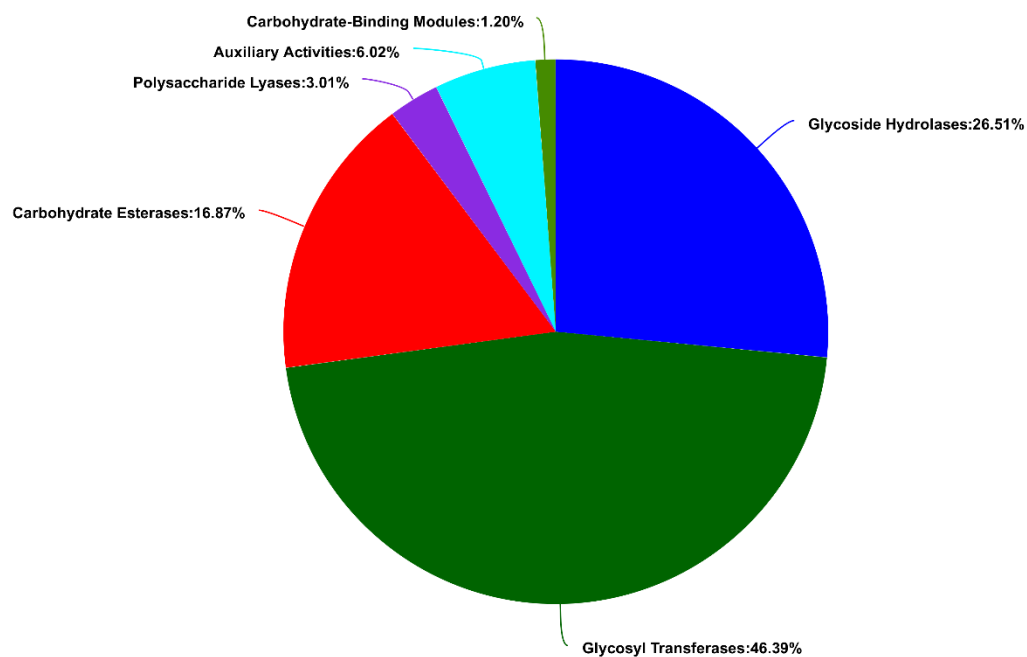

**Figure S6.** Annotation statistics of CAZy database of YC-XJ1 genome.

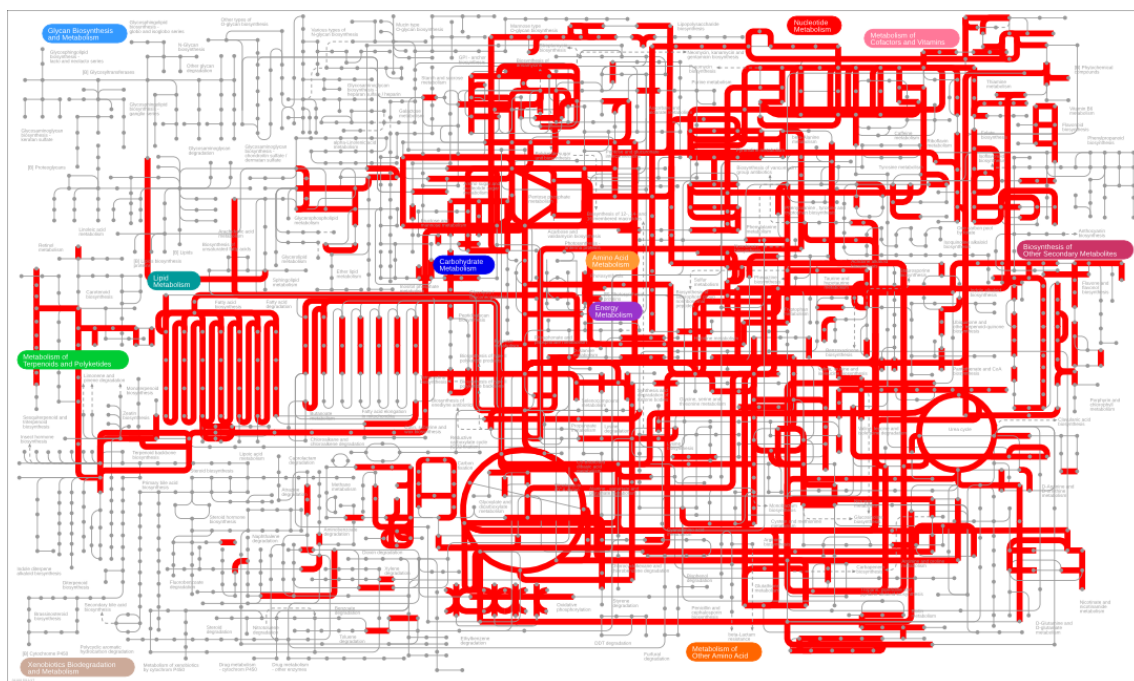

**Figure S7.** The summary of metabolic pathways of strain YC-XJ1 in KEGG database. The red dots represented the annotated pathways, the grey dots represented the unannotated pathways.

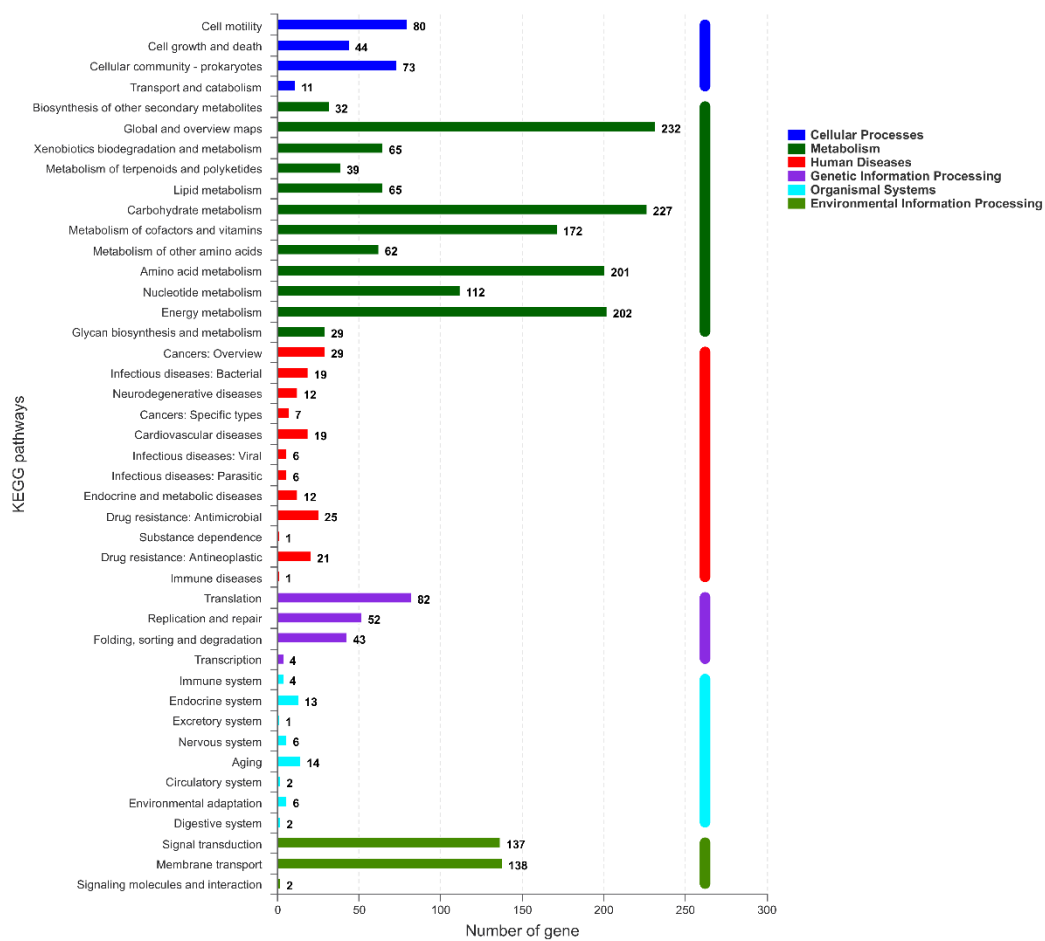

**Figure S8.** Pathway classification of YC-XJ1 genome annotated by KEGG.

```

      1      10      20      30      40      50
P24484 MPILPVPALNALLTKTIKTIKTGAANKAHQHHLHHTLKGLDNPAPLERINRRRK...
Q9US38 .....MSQTTTETIIFDSYKDKLDPEYVNFY
P9WK86 .....MTE.....PTVARPDIDPVLK...
DEPH1 .....L.....MTPAERDRIDREYNARA

      60      70      80      90     100
P24484 .....ASTAEQYPLADAHRLRLILAISNKKRPLAIDKLPKLRQKFGTDAVSLQAPS
Q9US38 NKYVCSNLPVTKTHIYVDFLR.....NNGNV.....P.....GQS
P9WK86 .....MLDTEPVTFTA.....ADGVEAR.....ARLRQLK.....TPP
DEPH1 .....SDFEF.....

     110     120     130     140     150     160
P24484 VWQONADASGSTENAVSWQKTIAN...ADGSDMTVRCYQKSTQNSERKSTDEAAMLEFFH
Q9US38 E.....LLEVESTEDITIPRKHTKAPSGVPSRIFRPHGT...APEGGWPCFLWFH
P9WK86 E.....LLEELRIERTV...GYDGLTIPVRVYWPP...VVRDNLPEVVVYH
DEPH1 EYARYVAAS...DAVSNLEEVADLAYDPASCTLDLY.....PAGRGSPLFLWIH

     170     180     190     200     210     220
P24484 CCFCTIGDIDTHHEFCHTVCAQTGWVVSVDYKMAPEPAFTAKDCIAYAWIAEHSQS
Q9US38 CQWVLGNINTESEATHMCEQAKCVNVNDYRIADDPPTACIDGQWELLYCIENADT
P9WK86 CQWVSLGGLDTHDPVARAHAVGAQATVVSVDYLAPEHPYACIDGQWALRWVGENAAE
DEPH1 CQWVRAISKD.DNAEPALGLVFNQVSVAVMNYGLAPAHILDEIVFOTRQALAWIHANAGR

     230     240     250     260     270     280
P24484 LCHSPSRIVLCSAGGCARLVAAQTKFPIDALWQDNNQAPADKKVNDTFKNSLADLP
Q9US38 LCHNPNKIAVCSAGGNTAAVLSHKMAA.....SPANFEP
P9WK86 LCHDPSRIAVCSAGGNTSAVMAQLA.....RDVGGP
DEPH1 LCHDARRLHVCSAGGHLGMLLAE.....WHAGFDIPGDV.....L...

      *

     290     300     310     320     330
P24484 RFDALPTLYPVTVVEEY...PSWELYGEGLLDHNDAEFNSAVTQHSGT.....PQ
Q9US38 PLVLLLVVPVCNTANAK.THKSWELFENTPQL...PAAKMMWYRRHYLFNEKDWNSNP
P9WK86 PLVFLWVPTTMADLSL...PSFTENADAPILDRDVIDAFALWVVPGLDISDHTMLP.
DEPH1 ..ASALHLSGIMDEFLRHTHINWMLDAA...L.....L.....A.....AR

     340     350     360     370     380     390
P24484 SHEPLTSMHGDNTPICPSYIVVAELDILRDEGLAYAEELLOKEGTCQTYTVLCAPEHFIN
Q9US38 EASPEFYDSSFFKNVCAALICAAQGVLSSEALAYNEKLTIAQCESTIKTYECCPEVMA
P9WK86 ..TTLAPGNADLSLCPAFITGTASHDLPDDACYAEELLTAQCSVELSNETHMVHGVN
DEPH1 RNSPHLIPRRESILLSSVGGLESDAFKACTSAETDAWTSAGHARRIAMPYVNHETIA

      *

     400     410     420     430
P24484 LMSVHQGLGN...QTYILNEFCLVQNLLTSEGDKPNLRA
Q9US38 MDAVLEKGRI LNKDATNALLAFA.....
P9WK86 FALVVPAAA...EATGRGLAALKRALHA.....
DEPH1 LSLSEAD.GT.....LARAVLAGC.....

```

**Figure S9.** The sequence alignment of DEPH1 with the most closely related proteins. P24484, Lipase 2 of *Moraxella* sp. TA144, available in UniProt Knowledgebase; Q9US38,  $\alpha/\beta$  hydrolase superfamily protein of *Schizosaccharomyces pombe* 972/ATCC 24843; P9WK86, Carboxylesterase NlhH of *Mycobacterium tuberculosis* CDC 1551/Oshkosh, available in the UniProt Knowledgebase. The conserved hydrolase motif (G-X-S-X-G) was underlined, and the amino acids that form the catalytic triad (Ser-Asp-His) was indicated by asterisks. The identical amino acid residues were shown in red color.

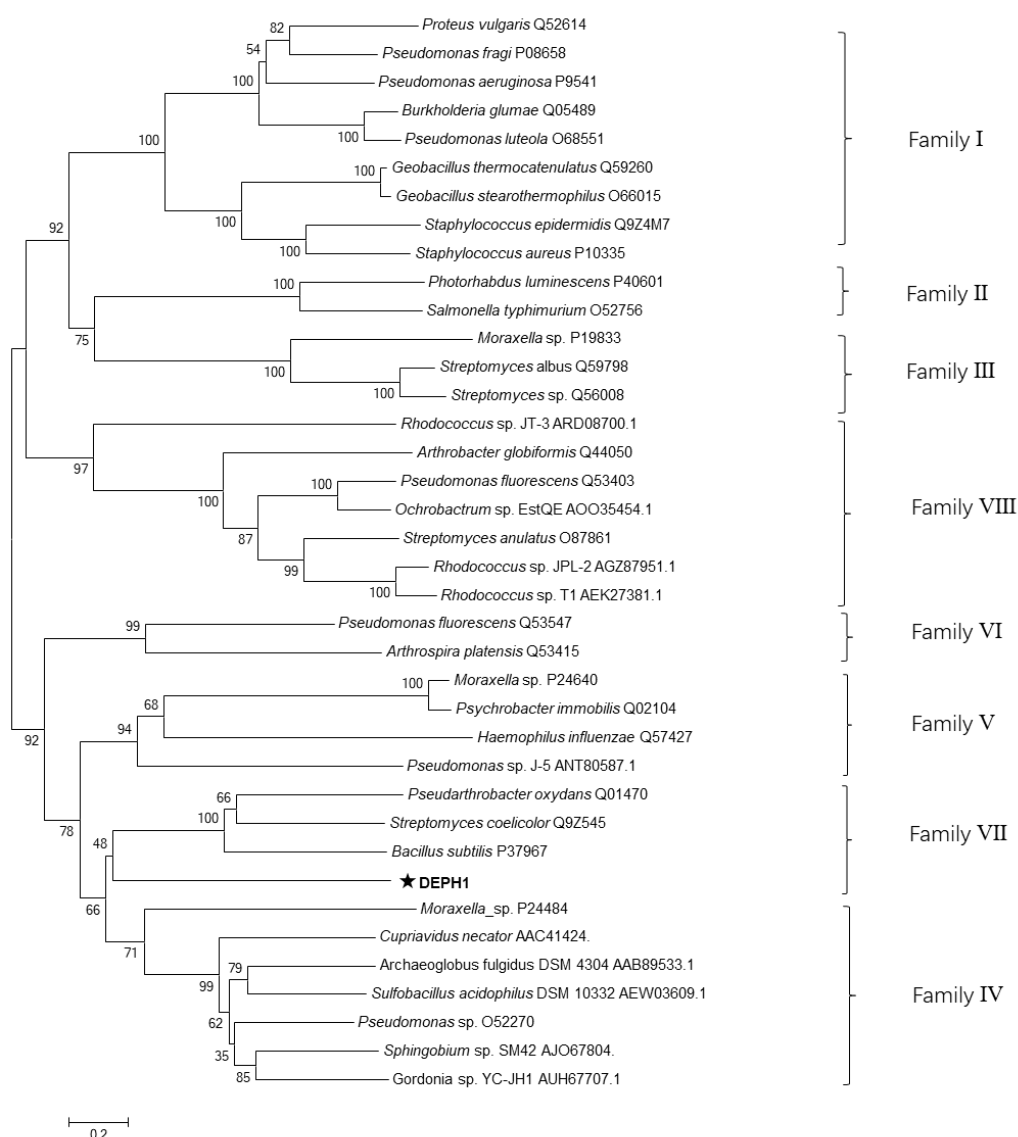

**Figure S10.** The phylogenetic analysis of DEPH1. The phylogenetic tree was constructed using Mega 5.0 by the neighbor-joining method, bootstrapping of 1000 replicates and Poisson model, and the details of sequences were showed in Table S2.

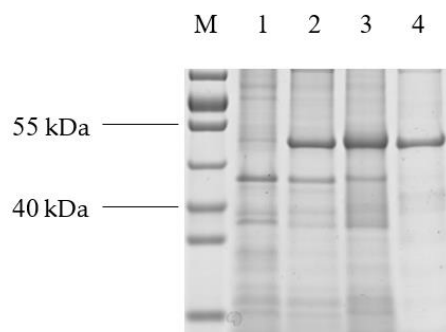

**Figure S11.** SDS-PAGE analysis of DEPH1 purification. Lane M: protein marker; lane 1: total protein of *E. coli* (pET32a); lane 2: total protein of *E. coli* (pET32a-deph1) after induction with IPTG; lane 3: supernatant of *E. coli* (pET32a-deph1) after induction with IPTG; lane 4: purified recombinant DEPH1.
